# Supplementary material for: NiMnOx/TiN/CC electrode with a branch–leaf structure: a novel approach to improve the performance of supercapacitors with high mass loading of amorphous metal oxides
Source: Royal Society of Chemistry journal article supplement (doi:10.1039/d1ta06379k), 2021-01-01
Supplement: d1ta06379k1.pdf [file d1ta06379k1.pdf]

**NiMnO<sub>x</sub>/TiN/CC electrode with branch-leaf structure: a novel approach to  
improve the performance of supercapacitors under high mass loading  
amorphous metal oxides**

*Huayao Tu,<sup>a</sup> Dong Shi,<sup>a</sup> Zhenyan Liang,<sup>a</sup> Hehe Jiang,<sup>a</sup> Zhen Kong,<sup>a</sup> Kang Zang,<sup>a</sup>*

*Yongliang Shao,<sup>\*a,b</sup> Yongzhong Wu<sup>a,b</sup> and Xiaopeng Hao<sup>\*a,b</sup>*

a State Key Laboratory of Crystal Materials, Shandong University, Jinan, Shandong,  
250100, P. R. China

b Department of Materials Science and Engineering, Qilu University of Technology,  
Jinan, 250353, P. R. China.

E-mail: shaoyonliang@qlu.edu.cn, xphao@sdu.edu.cn

**This file includes:**

**S1. Chemicals**

**S2. Synthetic Methods**

**S3. Materials Characterization**

**S4. Electrochemical Tests**

**S5. Supplementary Figs. S1–S34**

**S6. Supplementary Tables S1-S9**

**S7. Reference**

## S1. Chemicals

MnSO<sub>4</sub>·H<sub>2</sub>O, KMnO<sub>4</sub>, NiC<sub>4</sub>H<sub>6</sub>O<sub>4</sub>·4H<sub>2</sub>O, tetrabutyl titanate (TBT), acetone (C<sub>3</sub>H<sub>6</sub>O), FeCl<sub>3</sub>·6H<sub>2</sub>O, Na<sub>2</sub>SO<sub>4</sub>, HCl, and ethanol were purchased from Sinopharm Chemical Reagent Co., Ltd. (Shanghai). All those reagents were analytical grade. NH<sub>3</sub>, Ar was purchased from Deyang Special Gas Co., Ltd. (Jinan, China).

## S2. Synthetic Methods

**Preparation of acid-treated carbon fiber:** In a typical procedure, a piece of carbon fiber cloth (1.5 cm × 4 cm) was subsequently cleaned with deionized (DI) water and ethanol under ultrasonic, and dried in an oven. Then, the freshly cleaned CC was added into a stainless-steel autoclave (100 mL) containing commercially available concentrated HNO<sub>3</sub> (50 mL) and DI water (15 mL), and was held at 120 °C for 12 h. Then, the resulted CC was washed thoroughly with DI water until the pH is close to 7.

**Synthesis of TiN nanowires:** First, a piece of carbon cloth (1.5 cm × 4 cm) was placed in a 100 mL beaker containing 60 mL ethanol and 1 mL tetrabutyl titanate and ultrasonic agitation for 1 h. Then the carbon cloth was placed in a muffle furnace and kept at 400 °C for 0.5 h to obtain a carbon cloth with TiO<sub>2</sub> crystal seeds. Next, 15 mL of concentrated hydrochloric acid and 15 mL of acetone were put into a 50 mL beaker and stirred for 0.5 h. Then, 1.5 mL of tetrabutyl titanate was added slowly and stirred for 1 h. Afterward, the solution was transferred into a 50 mL Teflon lined stainless steel autoclave and the carbon cloth with TiO<sub>2</sub> crystal seeds was immersed in the reaction solution. The autoclave liners were kept at 200 °C for 1.5 h and then the obtained TiO<sub>2</sub>

array growth on the CC was washed with deionized water, ethanol and dried at 80 °C. TiN/CC nanowires samples were obtained by further annealing TiO<sub>2</sub>/CC precursors in NH<sub>3</sub> atmosphere at a heating rate of 5 °C min<sup>-1</sup> at 800°C for 4 h. Ar atmosphere was used to protect TiO<sub>2</sub>/CC precursors during heating and cooling.

**Synthesis of NiMnO<sub>x</sub>/CC, NiMn<sub>2</sub>O<sub>4</sub>/CC, and NiMnO<sub>x</sub>/TiN/CC electrode materials:** First, 0.1 mmol MnSO<sub>4</sub>·H<sub>2</sub>O and 0.3 mmol KMnO<sub>4</sub> were dissolved in two beakers containing 15 mL of deionized water respectively and stirred for 0.5 h. Next, mix the solutions in the two beakers and continue to stir for 0.5 h. Then, 0.2 mmol NiC<sub>4</sub>H<sub>6</sub>O<sub>4</sub>·4H<sub>2</sub>O was added into the beaker and continued to be stirred for 0.5 h. Transfer the above solution to a 50 mL Teflon lined stainless steel autoclave. Then, TiN/CC was immersed in the reaction solution. The autoclave was kept at 140 °C for 8 h, then the products were washed with deionized water and ethanol, and dried at 50°C to obtain the NiMnO<sub>x</sub>/TiN/CC electrode material. In the above process, replace TiN/CC with CC to obtain NiMnO<sub>x</sub>/CC electrode materials. The NiMnO<sub>x</sub>/CC electrode materials were further thermally annealed at 450°C under Ar atmosphere for 2 h at the heating rate of 5 °C min<sup>-1</sup> to obtain NiMn<sub>2</sub>O<sub>4</sub>/CC electrode materials. Furthermore, the amount of added Ni source and Mn source was increased to improve the mass load of NiMnO<sub>x</sub> nanosheets in the electrode material. The mass loading of the electrode material was determined by the mass difference before and after hydrothermal treatment.

**Synthesis of FeOOH/CC and FeOOH/TiN/CC electrode materials:** First, 0.48 g of FeCl<sub>3</sub>·6H<sub>2</sub>O powder and 0.13 g of Na<sub>2</sub>SO<sub>4</sub> powder were dissolved with 30 mL of

distilled water and stirred for 0.5 h. After that, the above solution was transferred into a 50 mL Teflon lined stainless steel autoclave and one piece of TiN/CC was immersed into the reaction solution. The autoclave liners were kept at 150 °C for 7 h and then the obtained hydroxide array growth on the carbon fiber was washed with deionized (DI) water, ethanol and dried at 50 °C. Finally, FeOOH/TiN/CC electrode materials were obtained. Moreover, in the above process, replace TiN/CC with CC to obtain FeOOH/CC electrode materials.

**Assembling flexible ASC devices:** The ASC devices were assembled using NiMnO<sub>x</sub>/TiN/CC and FeOOH/TiN/CC as electrodes with a separator (filter paper) and PVA/Na<sub>2</sub>SO<sub>4</sub> as gel electrolyte. First, the PVA/ Na<sub>2</sub>SO<sub>4</sub> gel was synthesized by mixing 6 g of Na<sub>2</sub>SO<sub>4</sub> and 9 g of PVA in 60 mL of deionized water. Then heat the mixture at 85°C and stirred vigorously for 2 h. Before assembly, the positive and negative electrodes and diaphragm were immersed in PVA/Na<sub>2</sub>SO<sub>4</sub> gel for 5 min to assemble the ASC device and encapsulated by a thermoplastic machine. Finally, the device was maintained at 45 °C overnight. The entire as-fabricated device was compact at an area of approximately 7.5 cm<sup>2</sup> (5 cm × 1.5 cm).

### **S3. Materials Characterization**

The morphology and phase structure of the samples were investigated with FESEM (Hitachi-S4800), HRTEM (JEM 2100F), XRD (Bruker D8 Advance), and XPS (Philips Tecnai Twin-20U), respectively.

#### S4. Electrochemical Tests

The electrochemical characterizations of the prepared electrodes were tested using a three-electrode system on a CHI660E electrochemical workstation (Shanghai Chen Hua Instruments Co., China). In the test system, the self-supported binder-free prepared electrodes were used as the working electrode, with a platinum sheet (1 cm × 1 cm) as a counter electrode and Ag/AgCl as a reference electrode, in a 1.0 M Na<sub>2</sub>SO<sub>4</sub> aqueous solution.

All the electrochemical measurements with galvanostatic charge/discharge (GCD), cyclic voltammetry (CV), and electrochemical impedance spectroscopy (EIS) techniques were conducted in a three-electrode system. For detail, CV and GCD curves were collected against SCE by varying the scan rate from 5 mV s<sup>-1</sup> to 100 mV s<sup>-1</sup> and current density from 5 to 100 mA cm<sup>-2</sup>, respectively. Alternating current EIS spectra were collected within a frequency range of 10<sup>-2</sup> Hz – 10<sup>5</sup> Hz at the open-circuit voltage with an AC amplitude of 5 mV.

For three-electrode cells, specific capacity derived from GCD discharge curves was calculated as:

$$C(\text{mF}/\text{cm}^2) = I \int (1/V(t))dt$$

where I is the applied constant-current density, t is the discharge time, and V(t) is the potential as a function of t.

Areal energy density (E, Wh cm<sup>-2</sup>) and power density (P, W cm<sup>-2</sup>) of the flexible ASC devices are calculated using the following equations:

$$Es = \frac{Cs \times U^2}{2 \times 3600}$$

$$Ps = \frac{Es \times 3600}{\Delta t}$$

Where  $Cs$  ( $\text{mF cm}^{-2}$ ) is the specific capacitance,  $U$  is the operating voltage (V),  $\Delta t$  is the discharge time of flexible ASC.

S5. Supplementary Figs. S1–S34

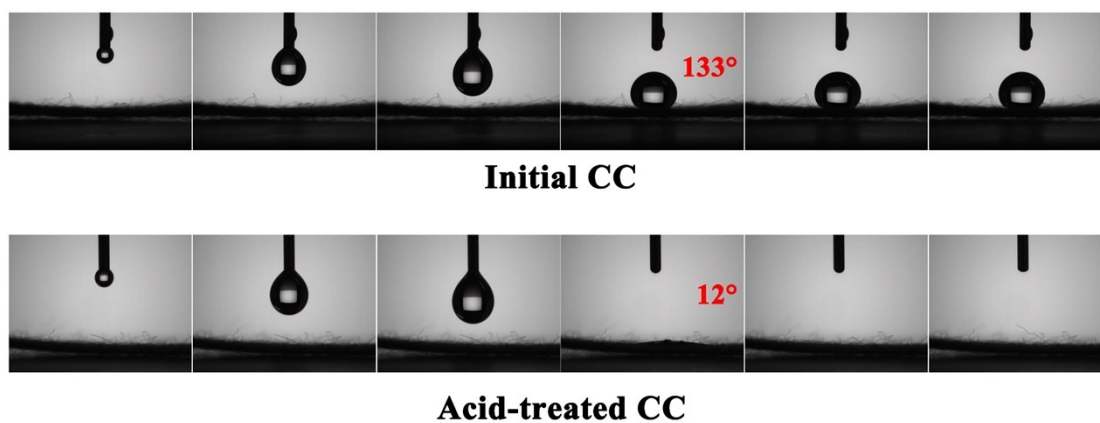

Fig. S1 Water contact angles of CC and acid-treated clean CC

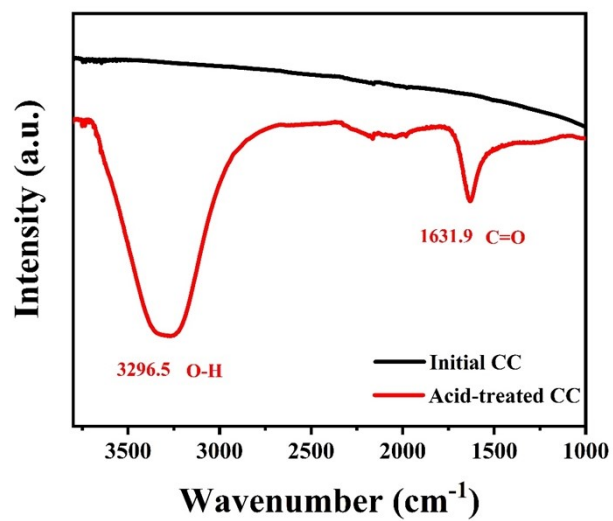

Fig. S2 FTIR spectra of CC and acid-treated clean CC

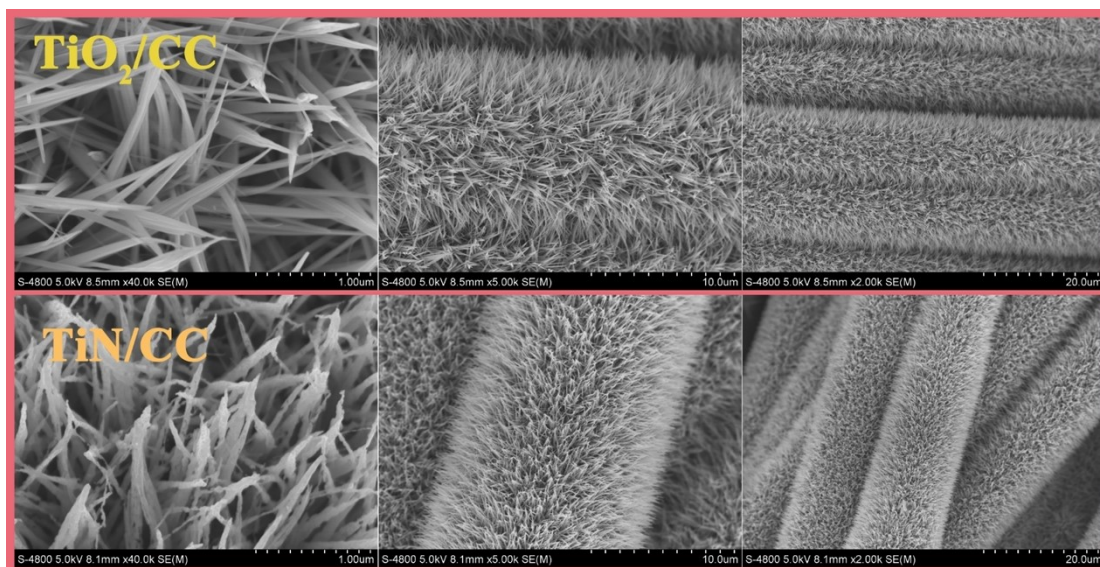

**Fig. S3** SEM images of  $\text{TiO}_2$  nanowire and TiN nanowire.

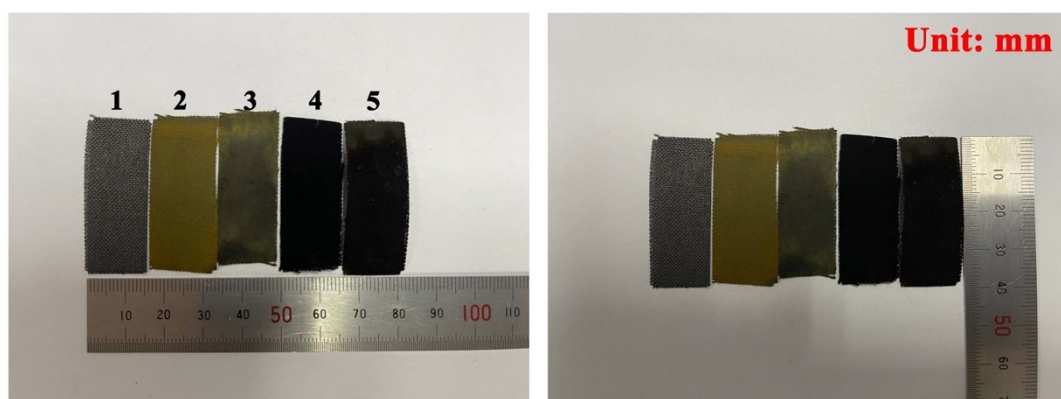

**1: CC 2: FeOOH/CC 3: FeOOH/TiN/CC 4: NiMnO<sub>x</sub>/CC 5: NiMnO<sub>x</sub>/TiN/CC**

**Fig. S4** Digital photos of as-prepared electrode materials

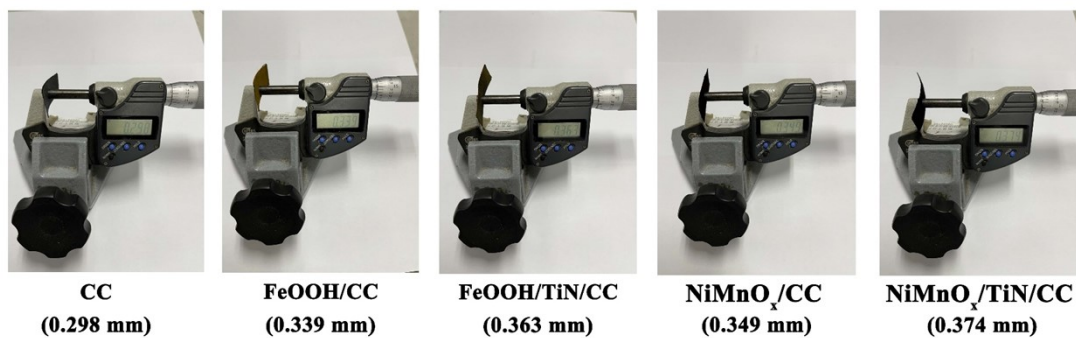

**Fig. S5** The thickness display of the prepared electrode materials



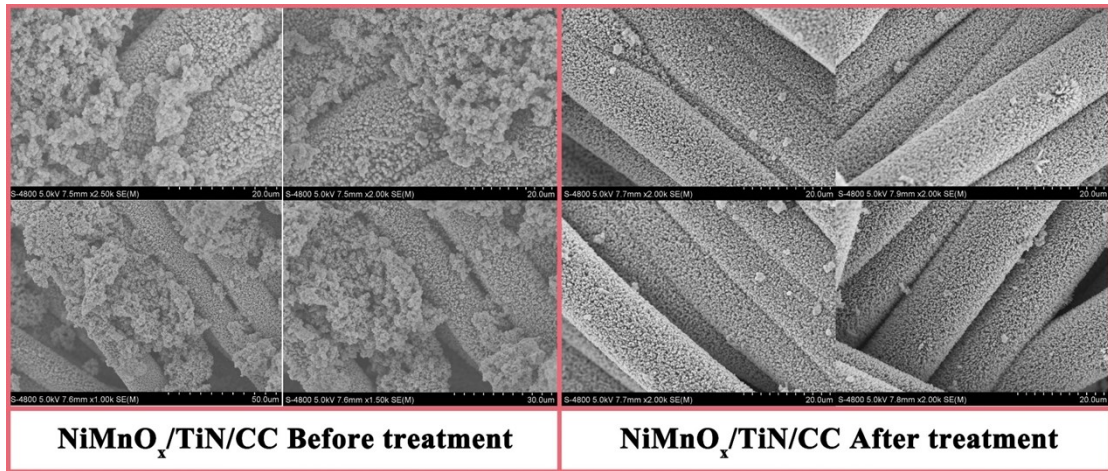

**Fig. S6** SEM images of NiMnO<sub>x</sub>/TiN/CC electrode materials before and after treatment

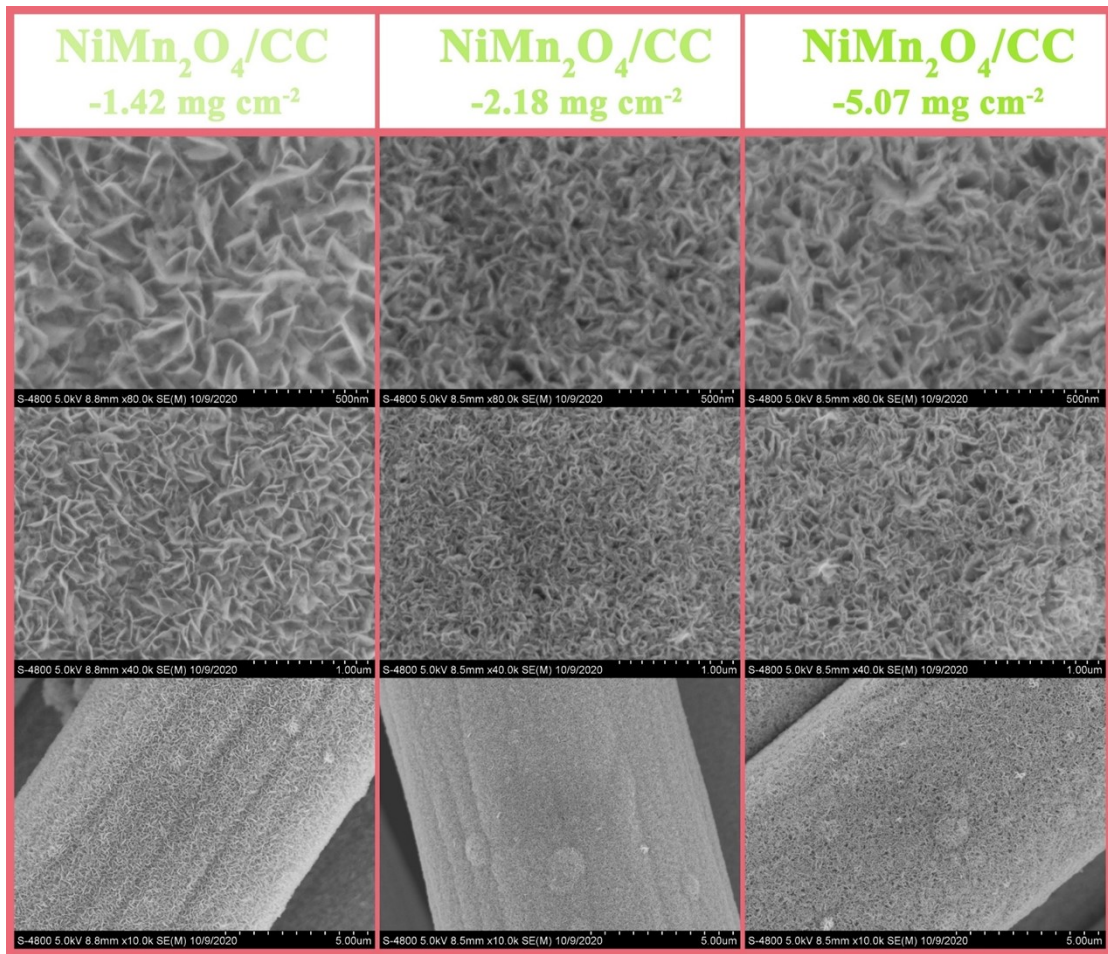

**Fig. S7** SEM images of NiMn<sub>2</sub>O<sub>4</sub>/CC under different mass loading (from 1.42 to 5.07 mg cm<sup>-2</sup>).

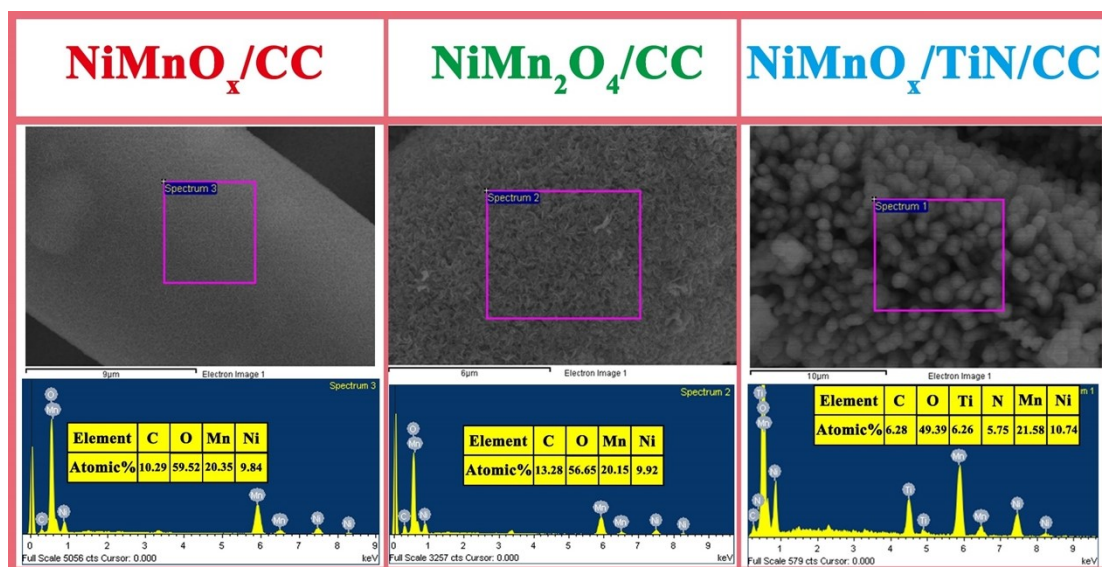

**Fig. S8** EDS characterization of NiMnO<sub>x</sub>/CC, NiMn<sub>2</sub>O<sub>4</sub>/CC, and NiMnO<sub>x</sub>/TiN/CC electrode materials

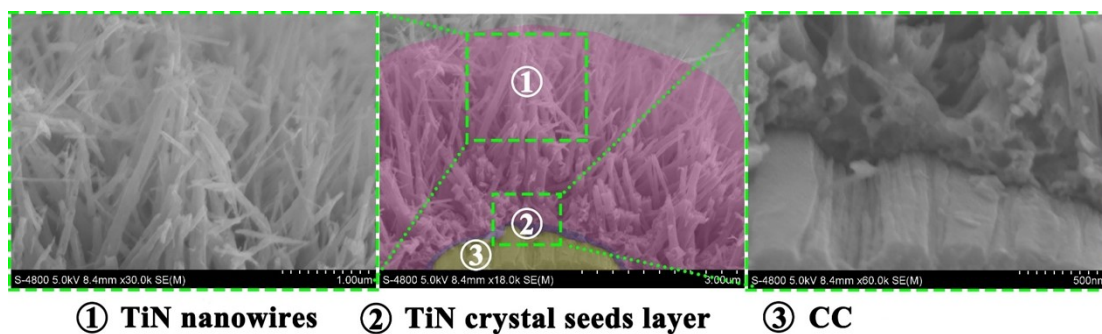

**Fig. S9** Cross-section SEM images of TiN/CC electrode material

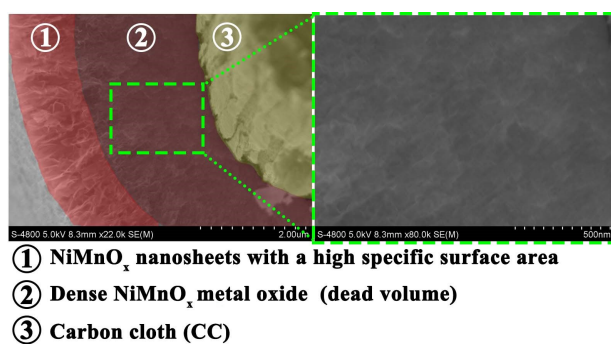

**Fig. S10** Cross-section SEM images of NiMnO<sub>x</sub>/CC electrode material under high mass

loading

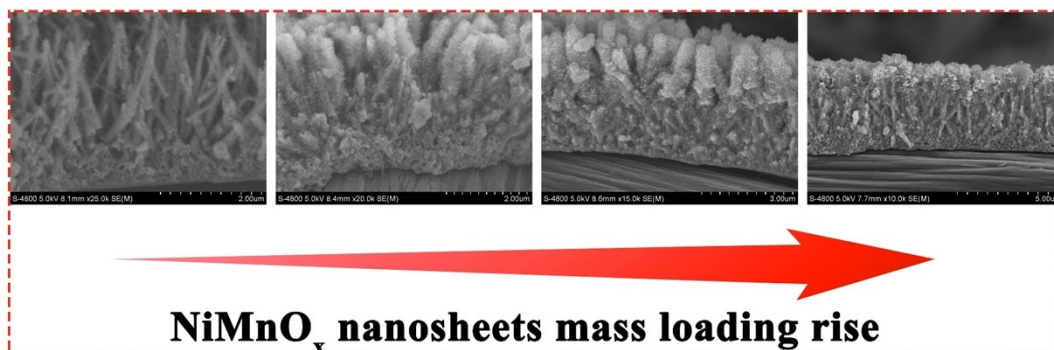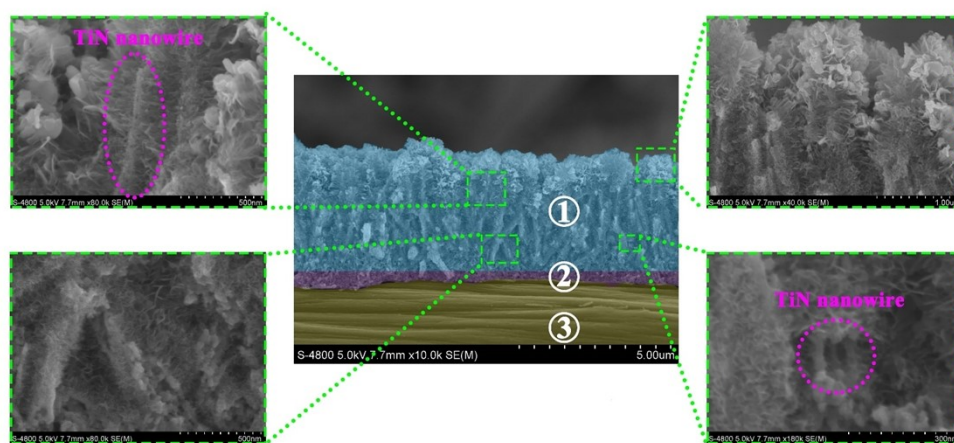

- ① TiN nanowires / NiMnO<sub>x</sub> nanosheets with a high specific surface area
- ② TiN crystal seeds layer
- ③ CC

**Fig. S11** Cross-section SEM images of NiMnO<sub>x</sub>/TiN/CC electrode material under different mass loading

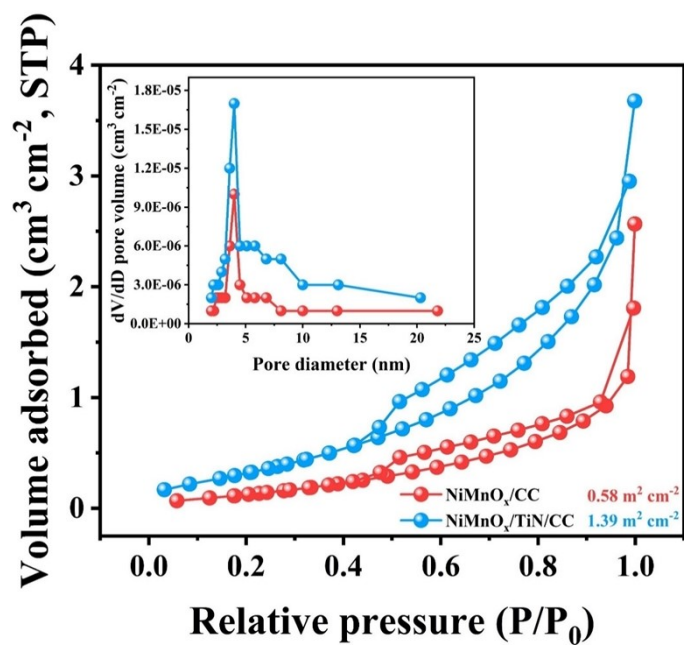

**Fig. S12** Nitrogen adsorption-desorption isotherms of  $\text{NiMnO}_x/\text{CC}$  and  $\text{NiMnO}_x/\text{TiN}/\text{CC}$  electrodes.

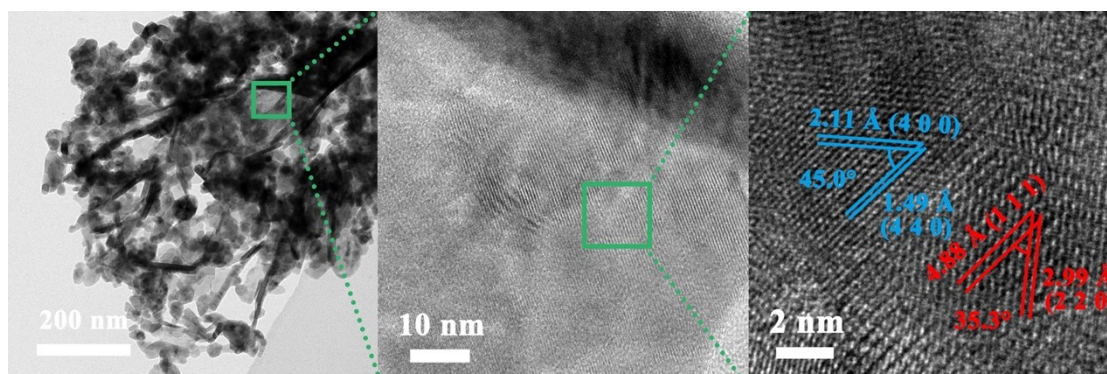

**Fig. S13** TEM and HRTEM of  $\text{NiMn}_2\text{O}_4/\text{CC}$  electrodes.

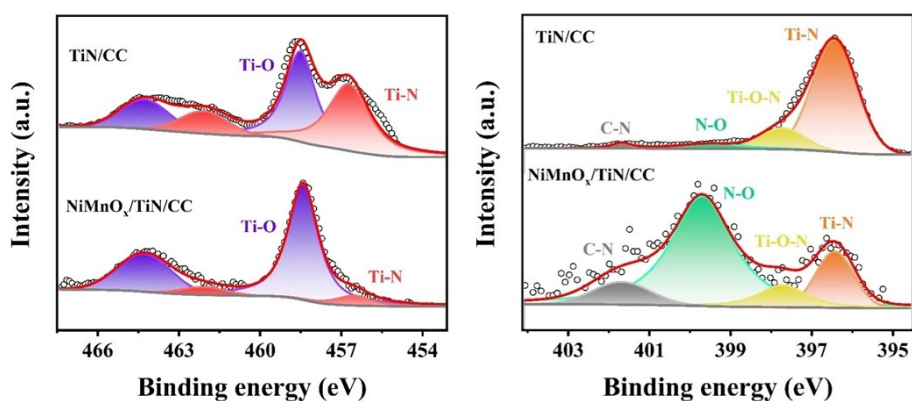

**Fig. S14** XPS spectra of Ti 2p and N 1s in TiN/CC and NiMnO<sub>x</sub>/TiN/CC electrode materials

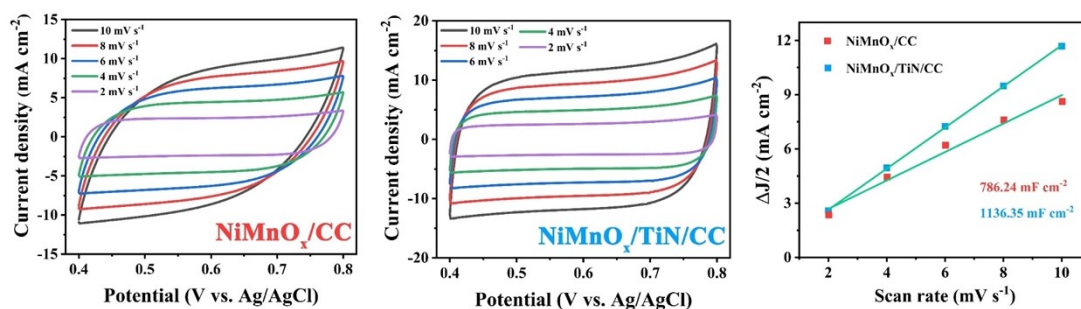

**Fig. S15** The electrochemically active area of the prepared NiMnO<sub>x</sub>/CC and NiMnO<sub>x</sub>/TiN/CC electrodes were estimated through utilizing a series of CV curves at different scan rates. CV curves at different scan rates in the region between 0.4 V and 0.8 V (vs. SCE) were recorded. The differences in current densities ( $\Delta J/2 = (J_a - J_c)/2$ ) at 0.6 V (vs. SCE) plotted against the scan rates fit to a linear regression and the slope is  $C_{dl}$  (double layer capacitance).

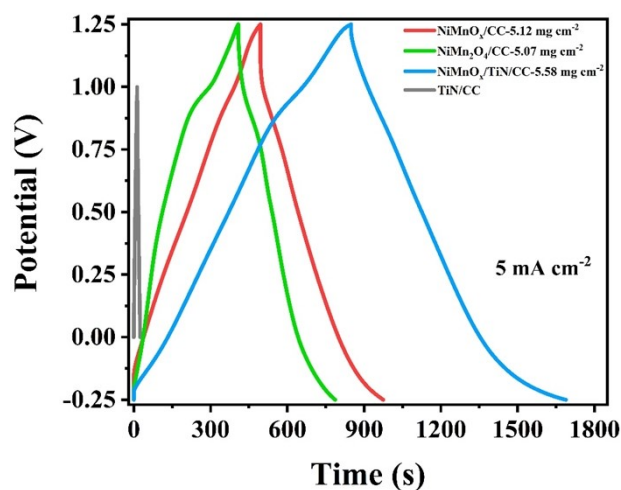

**Fig. S16** GCD curves of TiN/CC, NiMnO<sub>x</sub>/CC, NiMn<sub>2</sub>O<sub>4</sub>/CC and NiMnO<sub>x</sub>/TiN/CC electrodes at 5 mA cm<sup>-2</sup>.

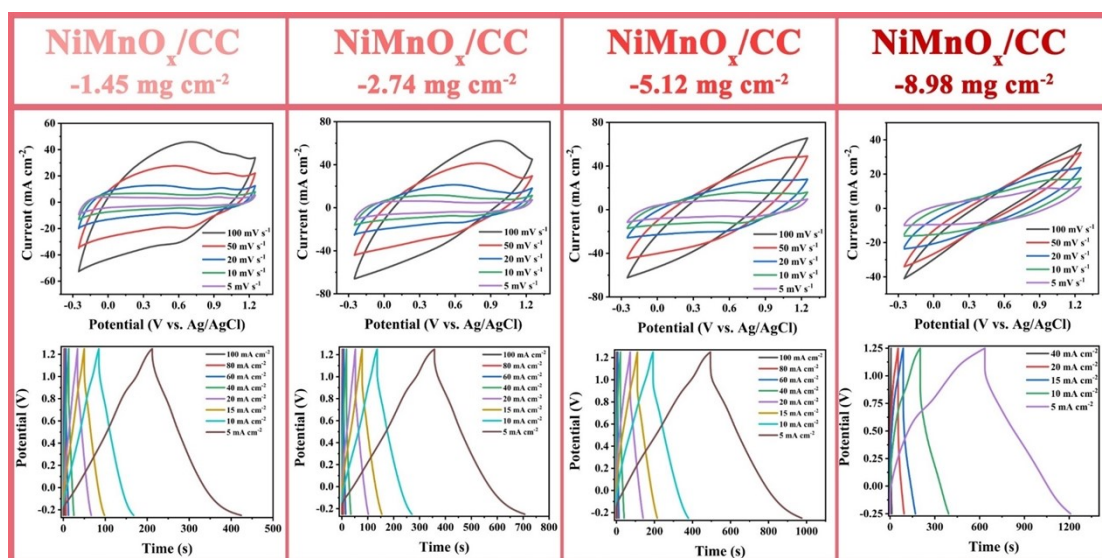

**Fig. S17** CV and GCD curves of NiMnO<sub>x</sub>/CC electrode.

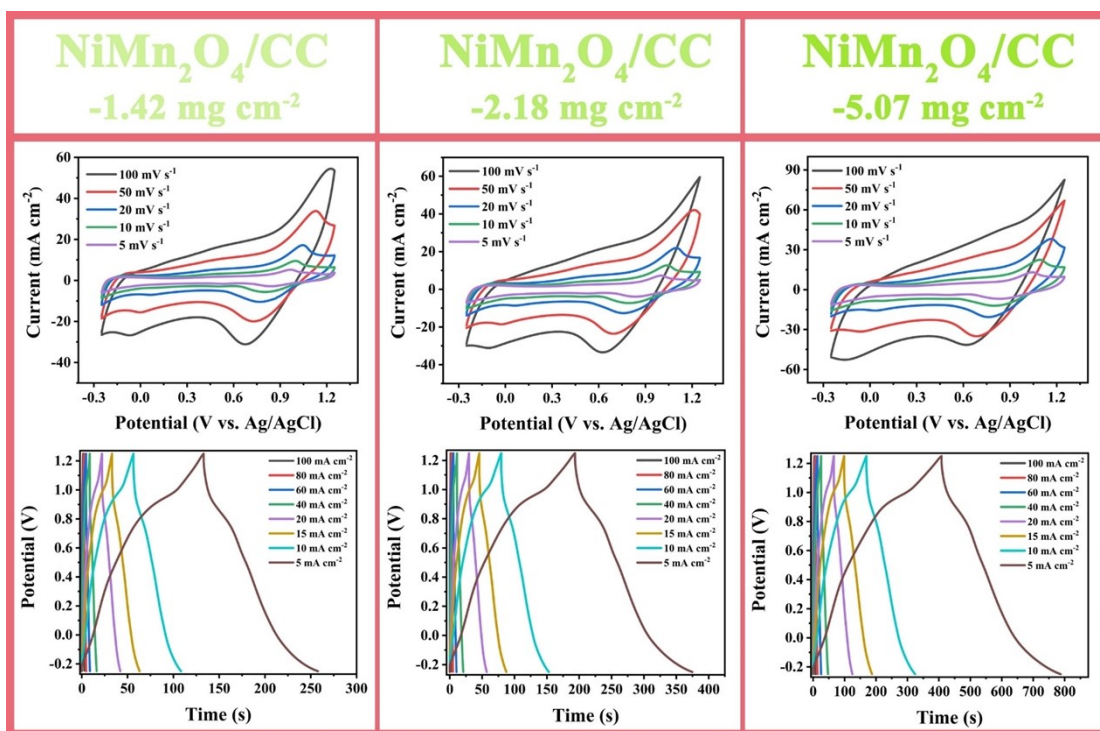

Fig. S18 CV and GCD curves of  $\text{NiMn}_2\text{O}_4/\text{CC}$  electrode.

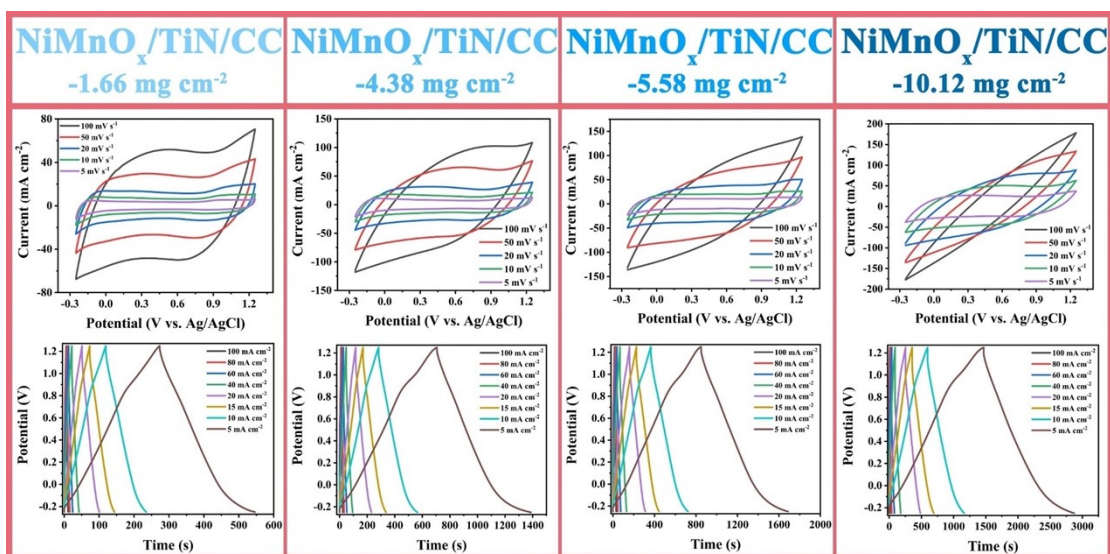

Fig. S19 CV and GCD curves of  $\text{NiMnO}_x/\text{TiN}/\text{CC}$  electrode.

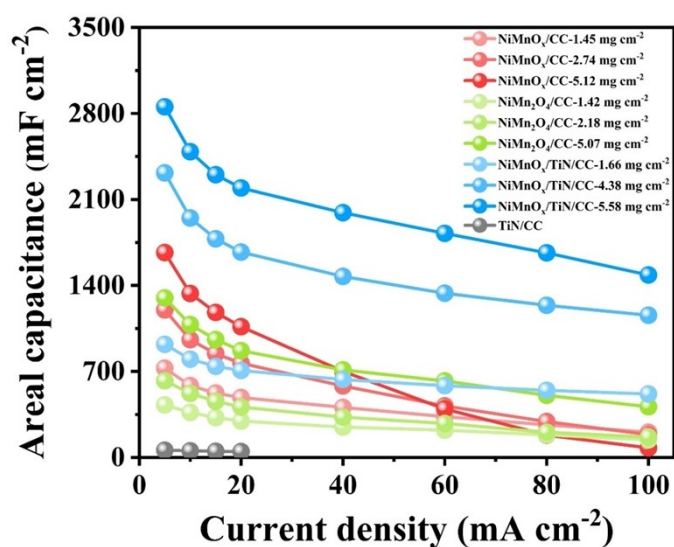

**Fig. S20** Rate performance of NiMnO<sub>x</sub>/CC, NiMn<sub>2</sub>O<sub>4</sub>/CC and NiMnO<sub>x</sub>/TiN/CC electrodes (mass loading from 1.42 to 5.58 mg cm<sup>-2</sup>).

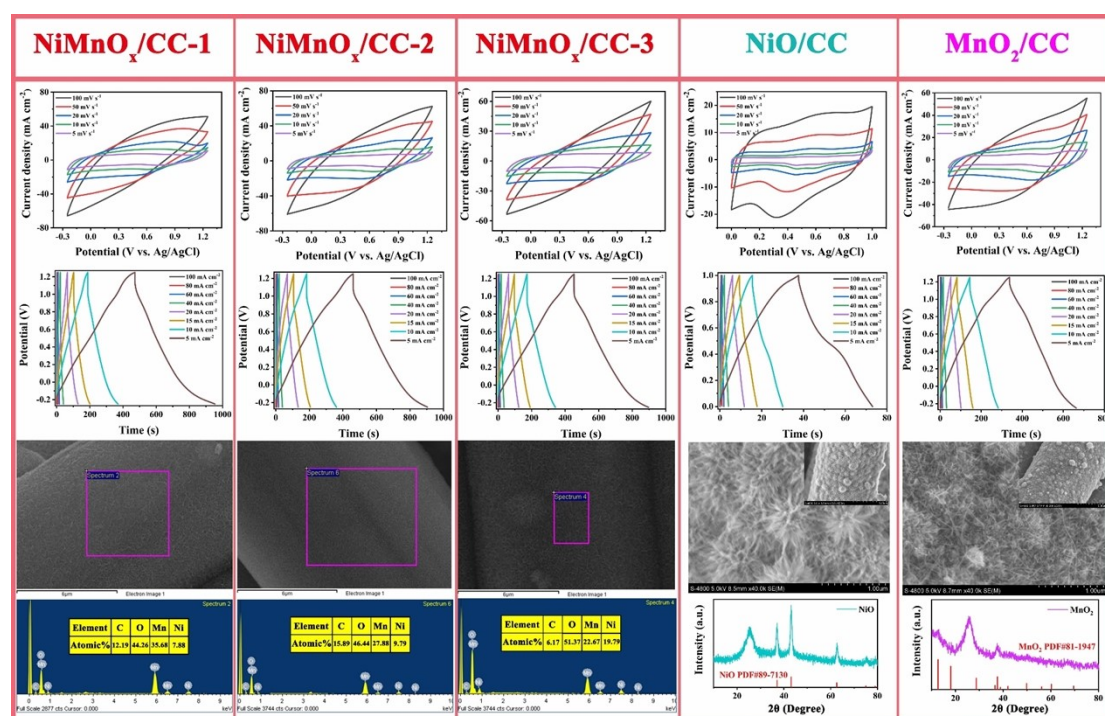

**Fig. S21** The electrochemical performances of NiO, MnO<sub>2</sub>, and NiMnO<sub>x</sub>/CC electrode materials with different atomic ratios of Ni to Mn (1:4.53, 1:2.85, 1.15:1) under same mass loading (about 5 mg cm<sup>-2</sup>)



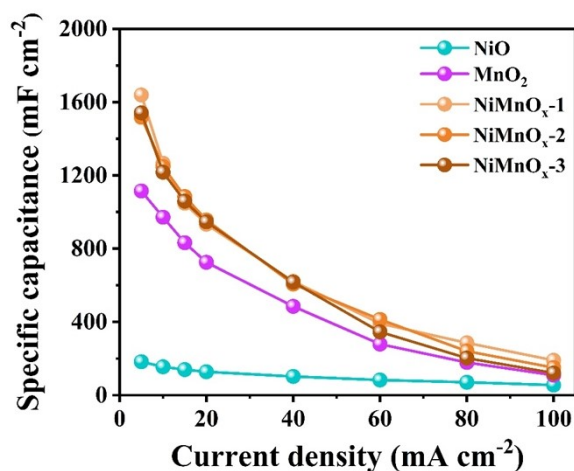

**Fig. S22** Rate performances of NiO, MnO<sub>2</sub>, and NiMnO<sub>x</sub>/CC electrode materials with different atomic ratios of Ni to Mn

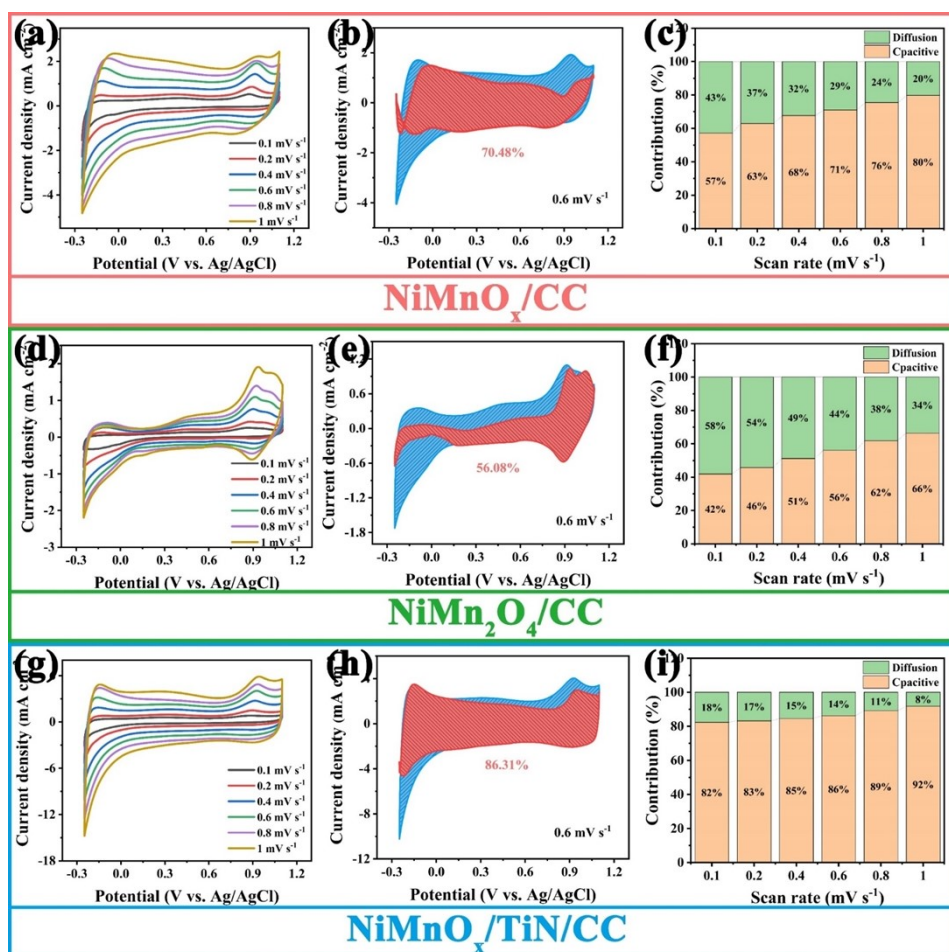

**Fig. S23** Analysis of dynamic process for NiMnO<sub>x</sub>/CC, NiMn<sub>2</sub>O<sub>4</sub>/CC and

NiMnO<sub>x</sub>/TiN/CC materials: (a, d, g) CV curves at scan rate of 0.1 to 1 mV s<sup>-1</sup>, (b, e, h) Proportion of capacitive current and diffusion current at 0.6 mV s<sup>-1</sup>, (c, f, i) Histogram of capacitive behavior contribution at different scan rates.

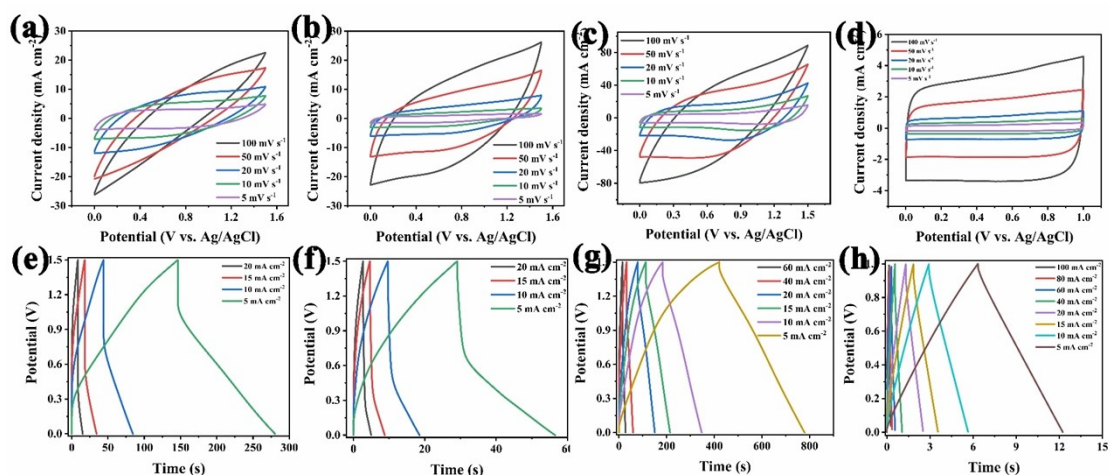

**Fig. S24** CV and GCD curves of symmetric supercapacitor devices: (a, e) NiMnO<sub>x</sub>/CC, (b, f) NiMn<sub>2</sub>O<sub>4</sub>/CC, (c, g) NiMnO<sub>x</sub>/TiN/CC, (d, h) TiN/CC.

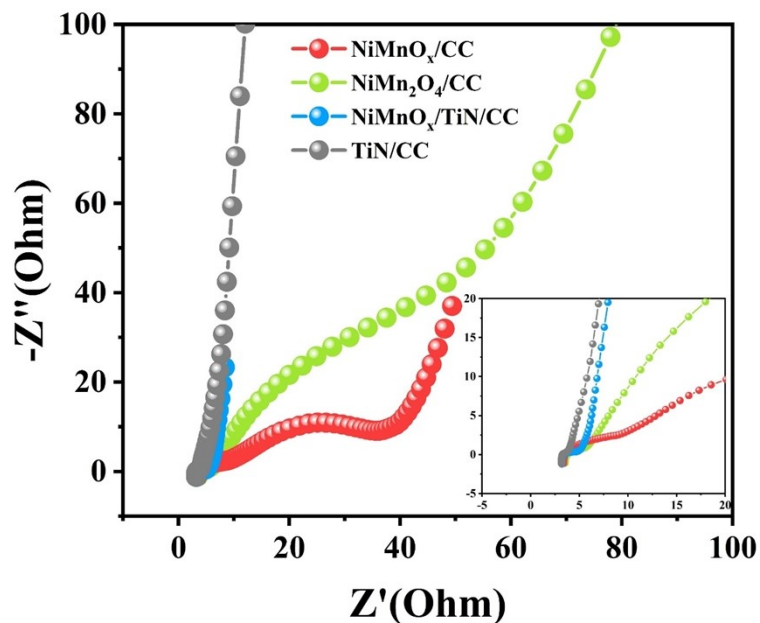

**Fig. S25** Nyquist plots of NiMnO<sub>x</sub>/CC, NiMn<sub>2</sub>O<sub>4</sub>/CC and NiMnO<sub>x</sub>/TiN/CC symmetric

supercapacitor devices.

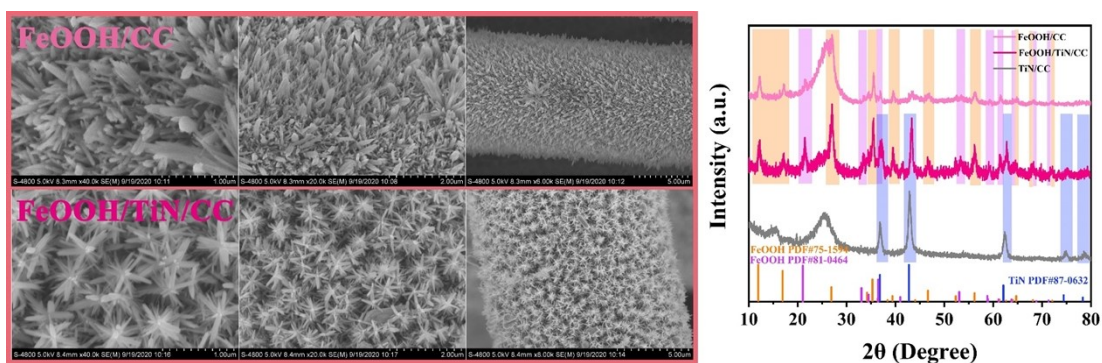

**Fig. S26** SEM images and XRD patterns of FeOOH/CC and FeOOH/TiN/CC electrodes.

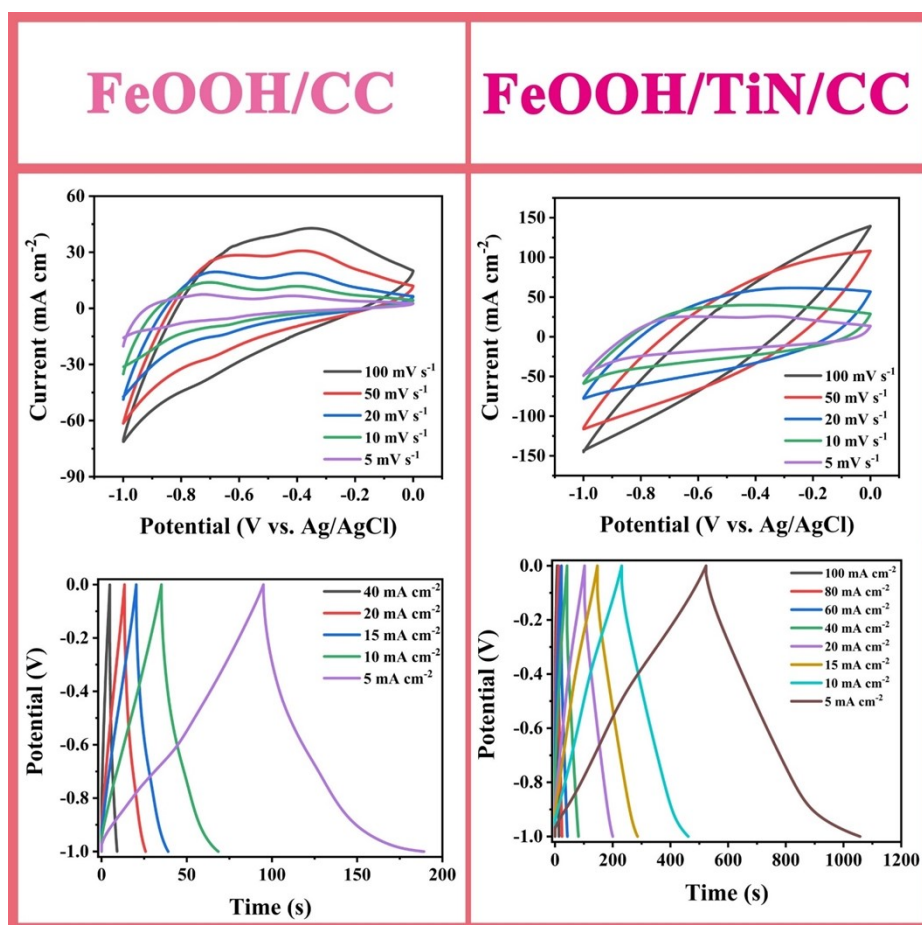

**Fig. S27** CV and GCD curves of FeOOH/CC and FeOOH/TiN/CC electrodes.

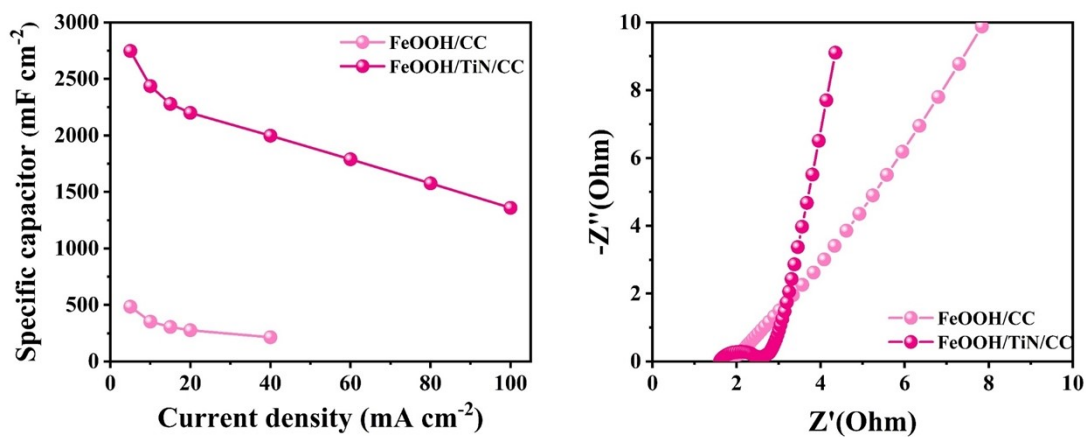

Fig. S28 Rate performance and EIS of FeOOH/CC and FeOOH/TiN/CC electrodes.

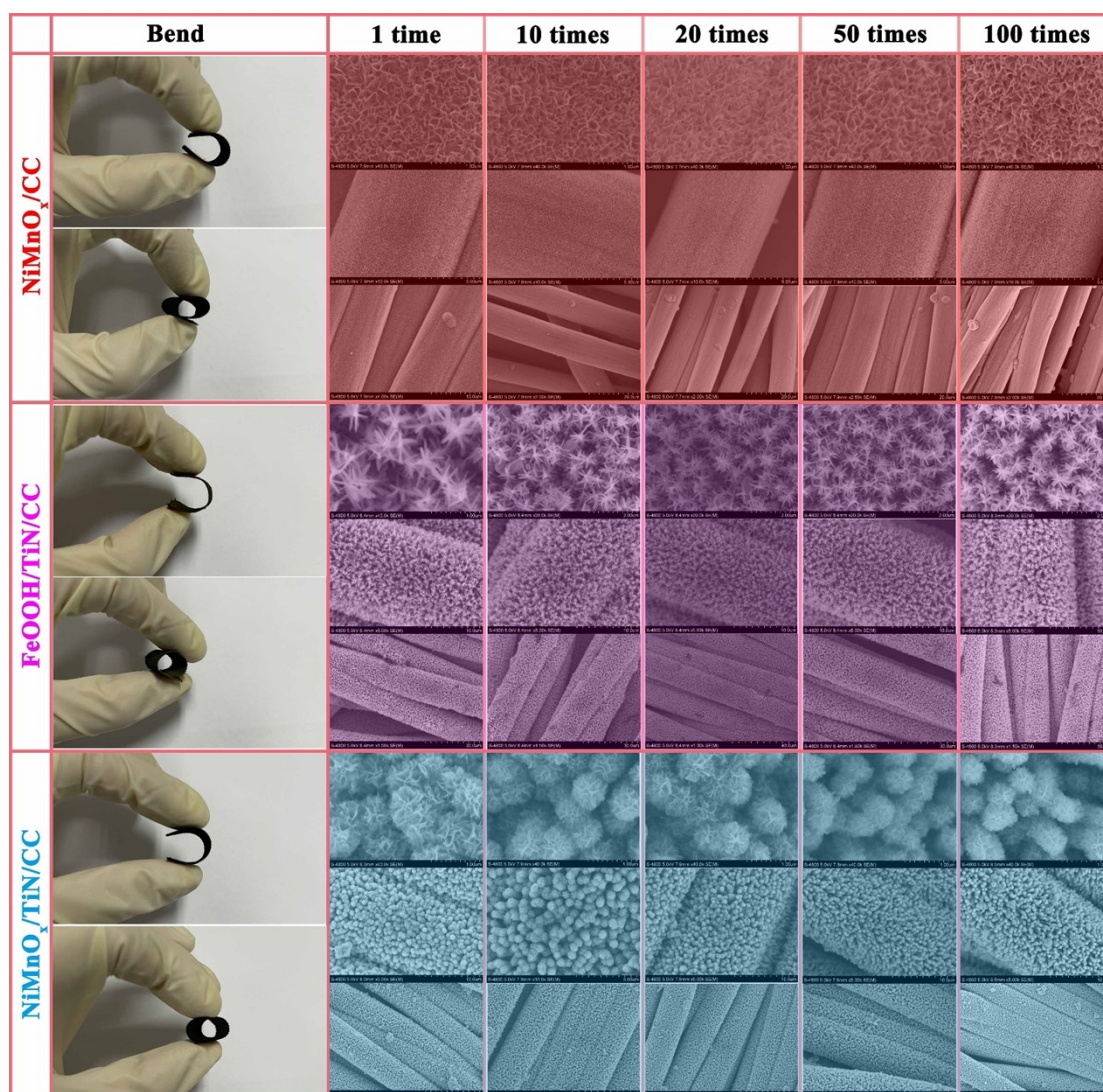

**Fig. S29** Microstructure of NiMnO<sub>x</sub>/CC, FeOOH/TiN/CC, and NiMnO<sub>x</sub>/TiN/CC

electrode materials during the continuous bending test

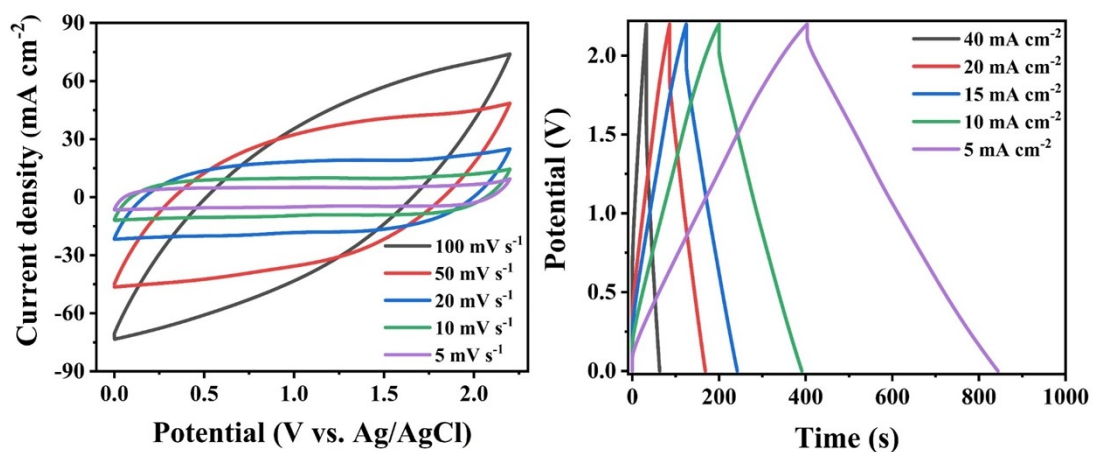

**Fig. S30** CV and GCD curves of NiMnO<sub>x</sub>/TiN/CC//FeOOH/TiN/CC flexible ASC

device.

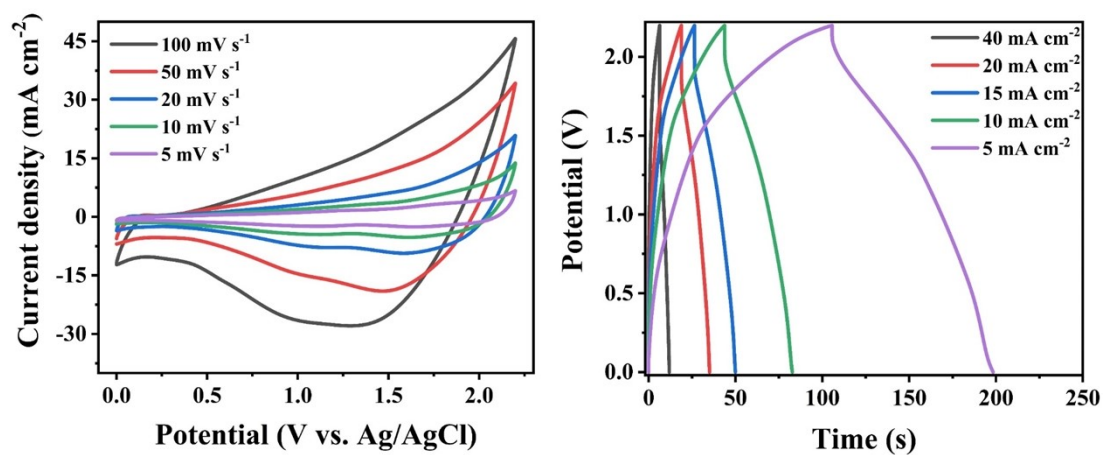

**Fig. S31** CV and GCD curves of NiMnO<sub>x</sub>/CC//FeOOH/CC flexible ASC device.

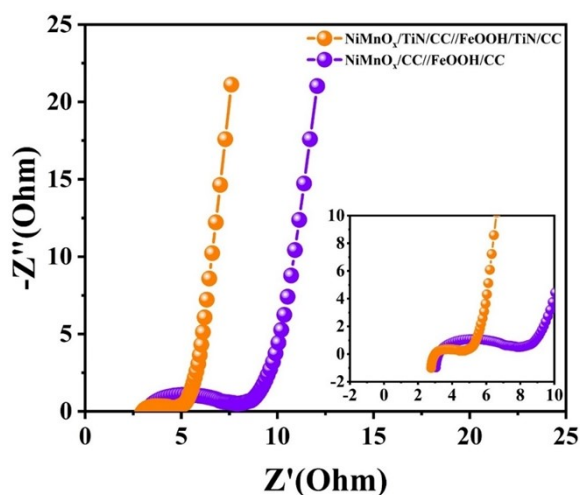

**Fig. S32** EIS of NiMnO<sub>x</sub>/TiN/CC//FeOOH/TiN/CC and NiMnO<sub>x</sub>/CC//FeOOH/CC flexible ASC devices.

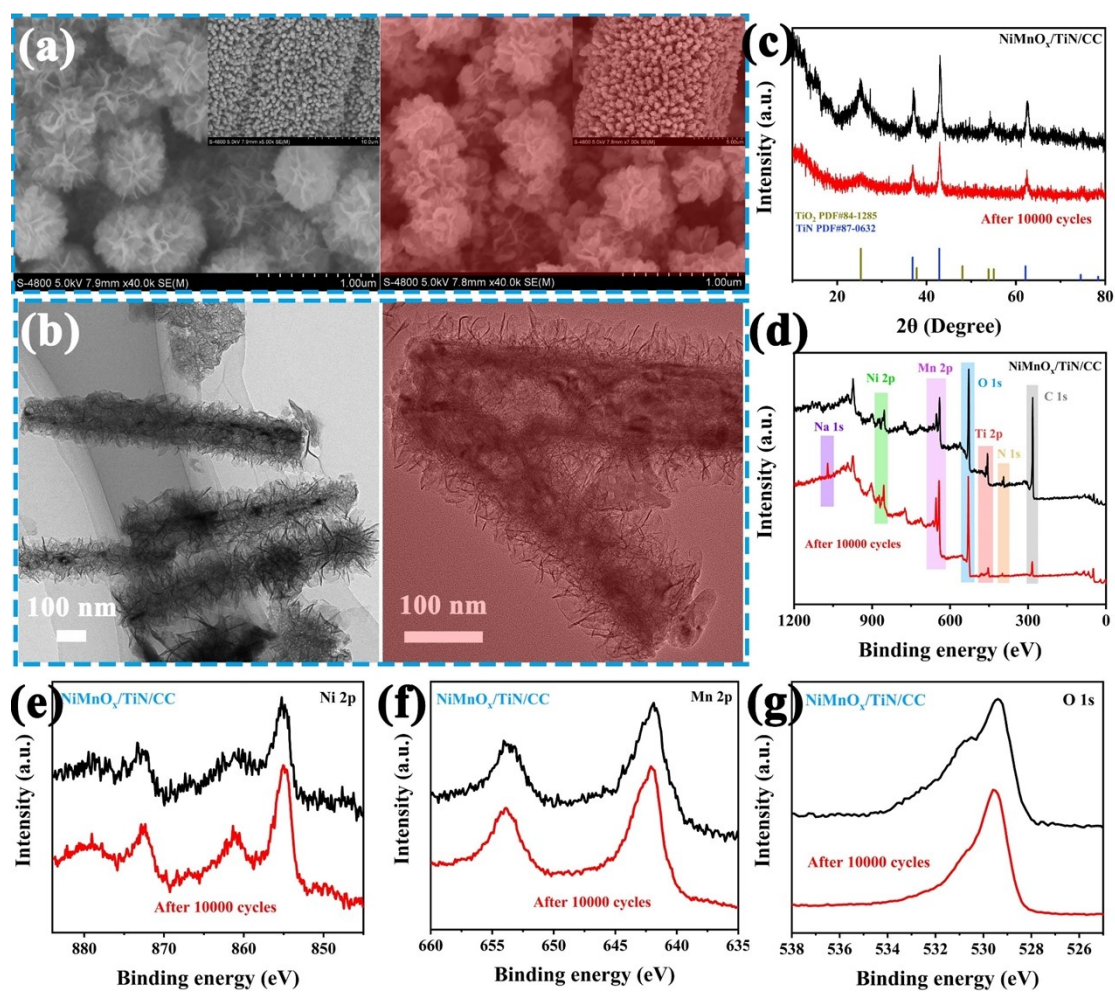

**Fig. S33** SEM images (a), TEM images (b), XRD patterns (c), XPS survey (d), high-

resolution XPS spectra of Ni 2p (e), Mn 2p (f), O1s (g) for NiMnO<sub>x</sub>/TiN/CC electrode before and after 10000 electrochemical cycles

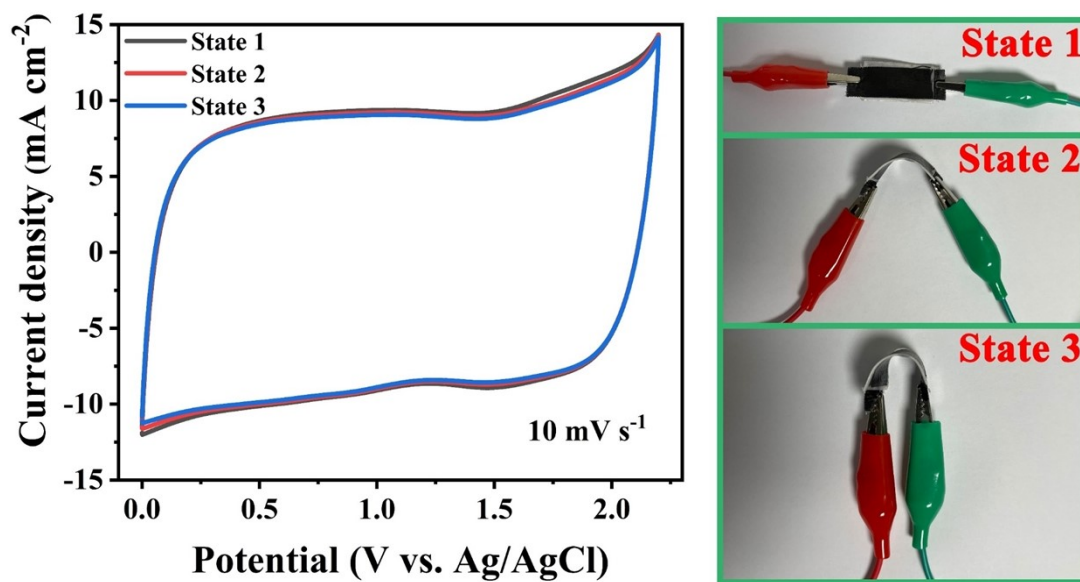

**Fig. S34** Flexibility testing of flexible ASC devices.

## S6. Supplementary Table S1-S9

**Table S1** EDS test results of NiMnO<sub>x</sub>/CC, NiMn<sub>2</sub>O<sub>4</sub>/CC, and NiMnO<sub>x</sub>/TiN/CC electrode materials. (Unit: Atomic%)

| Element                              | C     | O     | Ni    | Mn    | Ti   | N    |
|--------------------------------------|-------|-------|-------|-------|------|------|
| NiMnO <sub>x</sub> /CC               | 10.29 | 59.52 | 9.84  | 20.35 | \    | \    |
| NiMn <sub>2</sub> O <sub>4</sub> /CC | 13.28 | 56.65 | 9.92  | 20.15 | \    | \    |
| NiMnO <sub>x</sub> /TiN/CC           | 6.28  | 49.39 | 10.74 | 21.58 | 6.26 | 5.75 |

**Table S2** The areal capacitance of NiMnO<sub>x</sub>/CC, NiMn<sub>2</sub>O<sub>4</sub>/CC and NiMnO<sub>x</sub>/TiN/CC electrodes. (Unit: mF cm<sup>-2</sup>)

| Current density                        | 5 mA cm <sup>-2</sup> | 10 mA cm <sup>-2</sup> | 15 mA cm <sup>-2</sup> | 20 mA cm <sup>-2</sup> | 40 mA cm <sup>-2</sup> | 60 mA cm <sup>-2</sup> | 80 mA cm <sup>-2</sup> | 100 mA cm <sup>-2</sup> |
|----------------------------------------|-----------------------|------------------------|------------------------|------------------------|------------------------|------------------------|------------------------|-------------------------|
| NiMnO <sub>x</sub> -1.45               | 726.8                 | 585.1                  | 524.1                  | 488.3                  | 408.4                  | 333.0                  | 265.0                  | 205.9                   |
| NiMnO <sub>x</sub> -2.74               | 1201.6                | 958.9                  | 844.4                  | 768.0                  | 582.7                  | 419.8                  | 292.5                  | 185.7                   |
| NiMnO <sub>x</sub> -5.12               | 1667.5                | 1335.3                 | 1180.9                 | 1065.1                 | 701.2                  | 394.8                  | 182.2                  | 78.1                    |
| NiMnO <sub>x</sub> -8.98               | 2036.1                | 1431.1                 | 981.7                  | 670.8                  | 188.4                  | \                      | \                      | \                       |
| NiMn <sub>2</sub> O <sub>4</sub> -1.42 | 427.4                 | 366.01                 | 324.9                  | 297.3                  | 247.7                  | 223.2                  | 183.8                  | 143.7                   |
| NiMn <sub>2</sub> O <sub>4</sub> -2.18 | 624.9                 | 522.1                  | 457.7                  | 411.1                  | 328.5                  | 277.2                  | 205.5                  | 166.0                   |
| NiMn <sub>2</sub> O <sub>4</sub> -5.07 | 1298.0                | 1081.6                 | 959.5                  | 869.7                  | 713.24                 | 622.7                  | 506.2                  | 412.7                   |
| NiMnO <sub>x</sub> /TiN-1.66           | 921.3                 | 800.4                  | 741.3                  | 707.9                  | 634.8                  | 584.2                  | 546.4                  | 516.6                   |
| NiMnO <sub>x</sub> /TiN-4.38           | 2316.8                | 1949.2                 | 1779.9                 | 1671.45                | 1473.9                 | 1337.1                 | 1238.6                 | 1157.6                  |
| NiMnO <sub>x</sub> /TiN-5.58           | 2854.4                | 2489.1                 | 2301.3                 | 2193.5                 | 1992.3                 | 1824.3                 | 1665.9                 | 1485.7                  |
| NiMnO <sub>x</sub> /TiN-10.12          | 4882.6                | 4104.5                 | 3758.5                 | 3579.4                 | 3096.4                 | 2667.1                 | 2287.0                 | 1935.2                  |

**Table S3** EDS test results of NiMnO<sub>x</sub>/CC electrodes with different Ni to Mn atom ratios. (Unit: Atomic%)

| Element                  | C     | O     | Ni   | Mn    |
|--------------------------|-------|-------|------|-------|
| NiMnO <sub>x</sub> /CC-1 | 12.19 | 44.26 | 7.88 | 35.68 |



|                          |       |       |       |       |
|--------------------------|-------|-------|-------|-------|
| NiMnO <sub>x</sub> /CC-2 | 15.89 | 46.44 | 9.79  | 27.88 |
| NiMnO <sub>x</sub> /CC-3 | 6.17  | 51.37 | 19.79 | 22.67 |

**Table S4** The areal capacitances of NiMnO<sub>x</sub>/CC-1, NiMnO<sub>x</sub>/CC-2, NiMnO<sub>x</sub>/CC-3, NiO/CC, and MnO<sub>2</sub>/CC electrodes. (Unit: mF cm<sup>-2</sup>)

| Current density           | 5 mA cm <sup>-2</sup> | 10 mA cm <sup>-2</sup> | 15 mA cm <sup>-2</sup> | 20 mA cm <sup>-2</sup> | 40 mA cm <sup>-2</sup> | 60 mA cm <sup>-2</sup> | 80 mA cm <sup>-2</sup> | 100 mA cm <sup>-2</sup> |
|---------------------------|-----------------------|------------------------|------------------------|------------------------|------------------------|------------------------|------------------------|-------------------------|
| NiMnO <sub>x</sub> /CC-1  | 1638.7                | 1266.6                 | 1048.0                 | 933.2                  | 621.4                  | 391.8                  | 285.7                  | 190.8                   |
| NiMnO <sub>x</sub> /CC -2 | 1517.1                | 1248.4                 | 1084.1                 | 956.3                  | 606.8                  | 413.9                  | 240.2                  | 150.5                   |
| NiMnO <sub>x</sub> /CC -3 | 1541.5                | 1217.2                 | 1060.0                 | 946.1                  | 617.3                  | 345.9                  | 202.6                  | 121.4                   |
| NiO/CC                    | 182.5                 | 155.1                  | 139.9                  | 128.0                  | 102.5                  | 83.4                   | 70.5                   | 55.3                    |
| MnO <sub>2</sub> /CC      | 1115.2                | 971.7                  | 832.5                  | 725.7                  | 485.3                  | 278.8                  | 178.9                  | 109.4                   |

**Table S5** The IR drop of NiMnO<sub>x</sub>/CC, NiMn<sub>2</sub>O<sub>4</sub>/CC and NiMnO<sub>x</sub>/TiN/CC electrodes. (Unit: V)

| Current density                        | 5 mA cm <sup>-2</sup> | 10 mA cm <sup>-2</sup> | 15 mA cm <sup>-2</sup> | 20 mA cm <sup>-2</sup> | 40 mA cm <sup>-2</sup> | 60 mA cm <sup>-2</sup> | 80 mA cm <sup>-2</sup> | 100 mA cm <sup>-2</sup> |
|----------------------------------------|-----------------------|------------------------|------------------------|------------------------|------------------------|------------------------|------------------------|-------------------------|
| NiMnO <sub>x</sub> -1.45               | 0.04                  | 0.08                   | 0.12                   | 0.16                   | 0.31                   | 0.44                   | 0.56                   | 0.68                    |
| NiMnO <sub>x</sub> -2.74               | 0.05                  | 0.10                   | 0.15                   | 0.19                   | 0.36                   | 0.51                   | 0.66                   | 0.83                    |
| NiMnO <sub>x</sub> -5.12               | 0.06                  | 0.11                   | 0.17                   | 0.22                   | 0.40                   | 0.57                   | 0.76                   | 0.98                    |
| NiMn <sub>2</sub> O <sub>4</sub> -1.42 | 0.04                  | 0.07                   | 0.11                   | 0.15                   | 0.26                   | 0.39                   | 0.51                   | 0.64                    |
| NiMn <sub>2</sub> O <sub>4</sub> -2.18 | 0.04                  | 0.08                   | 0.11                   | 0.15                   | 0.28                   | 0.41                   | 0.55                   | 0.69                    |
| NiMn <sub>2</sub> O <sub>4</sub> -5.07 | 0.05                  | 0.09                   | 0.13                   | 0.17                   | 0.32                   | 0.47                   | 0.63                   | 0.80                    |
| NiMnO <sub>x</sub> /TiN-1.66           | 0.02                  | 0.05                   | 0.07                   | 0.10                   | 0.19                   | 0.28                   | 0.38                   | 0.48                    |
| NiMnO <sub>x</sub> /TiN-4.38           | 0.03                  | 0.06                   | 0.08                   | 0.11                   | 0.21                   | 0.31                   | 0.41                   | 0.51                    |
| NiMnO <sub>x</sub> /TiN-5.58           | 0.03                  | 0.06                   | 0.08                   | 0.11                   | 0.22                   | 0.32                   | 0.42                   | 0.53                    |

**Table S6** Comparison of areal capacitance and rate capability of NiMnO<sub>x</sub>/TiN/CC electrode with recently reported manganese oxide electrodes.

| Electrode | Mass loading (mg cm <sup>-2</sup> ) | Maximum areal capacitance | Minimum areal capacitance | Rate performance |
|-----------|-------------------------------------|---------------------------|---------------------------|------------------|
|-----------|-------------------------------------|---------------------------|---------------------------|------------------|

|                                                                 |                                             |                                                                                                                                                                                  |                                                                                                                                                                                       |                                                                                                                                                           |
|-----------------------------------------------------------------|---------------------------------------------|----------------------------------------------------------------------------------------------------------------------------------------------------------------------------------|---------------------------------------------------------------------------------------------------------------------------------------------------------------------------------------|-----------------------------------------------------------------------------------------------------------------------------------------------------------|
| <b>ZnO@MnO<sub>2</sub></b> <sup>1</sup>                         | 5.4                                         | 2280 mF cm <sup>-2</sup> at 0.5 A g <sup>-1</sup>                                                                                                                                | 810 mF cm <sup>-2</sup> at 10 A g <sup>-1</sup>                                                                                                                                       | 0.5-10 A g <sup>-1</sup> (20 times): 35.4%                                                                                                                |
| <b>MnO<sub>2</sub>/CNT</b> <sup>2</sup>                         | 8.3                                         | 2800 mF cm <sup>-2</sup> at 0.05 mV s <sup>-1</sup>                                                                                                                              | 1550 mF cm <sup>-2</sup> at 0.8 mV s <sup>-1</sup>                                                                                                                                    | 0.05-0.8 mV s <sup>-1</sup> (16 times): 55.3%                                                                                                             |
| <b>3D graphene/CNT/MnO<sub>2</sub></b> <sup>3</sup>             | 8.4                                         | 730 mF cm <sup>-2</sup> at 5 mV s <sup>-1</sup>                                                                                                                                  | 90 mF cm <sup>-2</sup> at 100 mV s <sup>-1</sup>                                                                                                                                      | 5-100 mV s <sup>-1</sup> (20 times): 12%                                                                                                                  |
| <b>MnO<sub>2</sub>/PEDOT</b> <sup>4</sup>                       | 8.6                                         | 800 mF cm <sup>-2</sup> @ 4 mV s <sup>-1</sup>                                                                                                                                   | 60 mF cm <sup>-2</sup> at 100 mV s <sup>-1</sup>                                                                                                                                      | 4-100 mV s <sup>-1</sup> (25 times): 8%                                                                                                                   |
| <b>MnO<sub>2</sub>/Graphene/Ni foam</b> <sup>5</sup>            | 6.11                                        | 1500 mF cm <sup>-2</sup> at 10 mV s <sup>-1</sup>                                                                                                                                | 450 mF cm <sup>-2</sup> @ 100 mV s <sup>-1</sup>                                                                                                                                      | 10-100 mV s <sup>-1</sup> (10 times): 30%                                                                                                                 |
| <b>3D graphene/MnO<sub>2</sub></b> <sup>6</sup>                 | 9.8                                         | 1420 mF cm <sup>-2</sup> at 2 mV s <sup>-1</sup>                                                                                                                                 | 100 mF cm <sup>-2</sup> at 100 mV s <sup>-1</sup>                                                                                                                                     | 2-100 mV s <sup>-1</sup> (50 times): 7%                                                                                                                   |
| <b>Hierarchical Nanostructures MnO<sub>2</sub></b> <sup>7</sup> | 10                                          | 3320 mF cm <sup>-2</sup> at 1 mA cm <sup>-2</sup>                                                                                                                                | 1900 mF cm <sup>-2</sup> at 30 mA cm <sup>-2</sup>                                                                                                                                    | 1-30 mA cm <sup>-2</sup> (30 times): 57.2%                                                                                                                |
| <b>MnO<sub>2</sub>/Ni foam</b> <sup>8</sup>                     | 18                                          | 2700 mF cm <sup>-2</sup> at 2 mA cm <sup>-2</sup>                                                                                                                                | 860 mF cm <sup>-2</sup> at 20 mA cm <sup>-2</sup>                                                                                                                                     | 2-20 mA cm <sup>-2</sup> (10 times): 31%                                                                                                                  |
| <b>MnO<sub>x</sub>-h</b> <sup>9</sup>                           | 9                                           | 1610 mF cm <sup>-2</sup> at 5 mV s <sup>-1</sup>                                                                                                                                 | 618 mF cm <sup>-2</sup> at 200 mV s <sup>-1</sup>                                                                                                                                     | 5-100 mV s <sup>-1</sup> (20 times): 38.4%                                                                                                                |
| <b>Mn<sub>3</sub>O<sub>4</sub>/MnOOH</b> <sup>10</sup>          | 10                                          | 192.2 C g <sup>-1</sup> at 1A g <sup>-1</sup>                                                                                                                                    | 51.3 C g <sup>-1</sup> at 20A g <sup>-1</sup>                                                                                                                                         | 1-20 A g <sup>-1</sup> (20 times): 26.7%                                                                                                                  |
| <b>NiMnO<sub>x</sub>/CC (this work)</b>                         | <b>5.12</b><br><b>8.98</b>                  | <b>1667.5 mF cm<sup>-2</sup> at 5 mA cm<sup>-2</sup></b><br><b>2036.1 mF cm<sup>-2</sup> at 5 mA cm<sup>-2</sup></b>                                                             | <b>78.1 mF cm<sup>-2</sup> at 100 mA cm<sup>-2</sup></b><br><b>188.4 mF cm<sup>-2</sup> at 40 mA cm<sup>-2</sup></b>                                                                  | <b>5-100 mA cm<sup>-2</sup> (20 times): 4.7%</b><br><b>5-40 mA cm<sup>-2</sup> (8 times): 9.3%</b>                                                        |
| <b>NiMnO<sub>x</sub>/TiN/CC (this work)</b>                     | <b>5.58</b><br><b>10.12</b><br><b>10.12</b> | <b>2854.4 mF cm<sup>-2</sup> at 5 mA cm<sup>-2</sup></b><br><b>4882.6 mF cm<sup>-2</sup> at 5 mA cm<sup>-2</sup></b><br><b>4882.6 mF cm<sup>-2</sup> at 5 mA cm<sup>-2</sup></b> | <b>1485.7 mF cm<sup>-2</sup> at 100 mA cm<sup>-2</sup></b><br><b>3096.4 mF cm<sup>-2</sup> at 40 mA cm<sup>-2</sup></b><br><b>1935.2 mF cm<sup>-2</sup> at 100 mA cm<sup>-2</sup></b> | <b>5-100 mA cm<sup>-2</sup> (20 times): 52.0%</b><br><b>5-40 mA cm<sup>-2</sup> (8 times): 63.4%</b><br><b>5-100 mA cm<sup>-2</sup> (20 times): 39.6%</b> |

**Table S7** The areal capacitance of NiMnO<sub>x</sub>/CC, NiMn<sub>2</sub>O<sub>4</sub>/CC and NiMnO<sub>x</sub>/TiN/CC symmetric supercapacitor devices. (Unit: mF cm<sup>-2</sup>)

| Current density                           | 5 mA cm <sup>-2</sup> | 10 mA cm <sup>-2</sup> | 15 mA cm <sup>-2</sup> | 20 mA cm <sup>-2</sup> | 40 mA cm <sup>-2</sup> | 60 mA cm <sup>-2</sup> |
|-------------------------------------------|-----------------------|------------------------|------------------------|------------------------|------------------------|------------------------|
| <b>NiMnO<sub>x</sub>-5.12</b>             | 485.65                | 322.02                 | 215.92                 | 134.90                 | \                      | \                      |
| <b>NiMn<sub>2</sub>O<sub>4</sub>-5.07</b> | 95.30                 | 64.96                  | 47.86                  | 36.77                  | \                      | \                      |
| <b>NiMnO<sub>x</sub>/TiN-5.58</b>         | 1224.14               | 1160.99                | 1115.47                | 1086.46                | 935.69                 | 779.15                 |
| <b>TiN/CC</b>                             | 30.21                 | 28.62                  | 27.52                  | 26.59                  | 24.18                  | 22.16                  |

**Table S8** The areal capacitance of FeOOH/CC and FeOOH/TiN/CC electrodes. (Unit:

mF cm<sup>-2</sup>)

| Current density | 5 mA cm <sup>-2</sup> | 10 mA cm <sup>-2</sup> | 15 mA cm <sup>-2</sup> | 20 mA cm <sup>-2</sup> | 40 mA cm <sup>-2</sup> | 60 mA cm <sup>-2</sup> | 80 mA cm <sup>-2</sup> | 100 mA cm <sup>-2</sup> |
|-----------------|-----------------------|------------------------|------------------------|------------------------|------------------------|------------------------|------------------------|-------------------------|
| FeOOH           | 484.4                 | 352.4                  | 304.4                  | 275.8                  | 213.9                  | \                      | \                      | \                       |
| FeOOH/TiN       | 2747.4                | 2436.3                 | 2278.5                 | 2199.1                 | 1997.1                 | 1788.6                 | 1575.9                 | 1359.2                  |

**Table S9** The areal capacitance of NiMnO<sub>x</sub>/CC//FeOOH/CC and NiMnO<sub>x</sub>/TiN/CC//FeOOH/TiN/CC electrodes. (Unit: mF cm<sup>-2</sup>)

| Current density                    | 5 mA cm <sup>-2</sup> | 10 mA cm <sup>-2</sup> | 15 mA cm <sup>-2</sup> | 20 mA cm <sup>-2</sup> | 40 mA cm <sup>-2</sup> |
|------------------------------------|-----------------------|------------------------|------------------------|------------------------|------------------------|
| NiMnO <sub>x</sub> //FeOOH         | 215.6                 | 184.6                  | 171.2                  | 161.3                  | 120.4                  |
| NiMnO <sub>x</sub> /TiN//FeOOH/TiN | 1038.2                | 936.2                  | 895.8                  | 865.1                  | 757.7                  |

## S7. References

- [1] M. Huang, F. Li, X. L. Zhao, D. Luo, X. Q. You, Y. X. Zhang and G. Li, *Electrochim. Acta*, 2014, **152**, 172–177.
- [2] L. Hu, W. Chen, X. Xie, N. Liu, Y. Yang, H. Wu, Y. Yao, M. Pasta, H. N. Alshareef and Y. Cui, *ACS Nano*, 2011, **5**, 8904–8913.
- [3] J. Liu, L. Zhang, H. B. Wu, J. Lin, Z. Shen and X. W. Lou, *Energy Environ. Sci.*, 2014, **7**, 3709.
- [4] Z. Su, C. Yang, C. Xu, H. Wu, Z. Zhang, T. Liu, C. Zhang, Q. Yang, B. Lia and F. Kang, *J. Mater. Chem. A*, 2013, **1**, 12432.
- [5] T. Zhai, F. Wang, M. Yu, S. Xie, C. Liang, C. Li, F. Xiao, R. Tang, Q. Wu, X. Lu and Y. Tong, *Nanoscale*, 2013, **5**, 6790.
- [6] Y. He, W. Chen, X. Li, Z. Zhang, J. Fu, C. Zhao and E. Xie, *ACS Nano*, 2013, **7**, 174–182.
- [7] Z. H. Huang, Y. Song, D. Y. Feng, Z. Sun, X. Sun and X. X. Liu, *ACS Nano*, 2018, **12**, 3557–3576.
- [8] J. Yang, L. Lian, H. Ruan, F. Xie and M. Wei, *Electrochim. Acta*, 2014, **163**, 189–194.
- [9] Y. Song, T. Liu, B. Yao, M. Li, T. Kou, Z. H. Huang, D. Y. Feng, F. Wang, Y. Tong, X. X. Liu and Y. Li, *ACS Energy Lett.*, 2017, **2**, 1752–1759.
- [10] W. Zheng, J. Halim, Z. M. Sun, J. Rosen and M. W. Barsoum, *Energy Storage Mater.*, 2021, **38**, 438–446.
